# Supplementary material for: Global Analysis and Comparison of the Transcriptomes and Proteomes of Group A Streptococcus Biofilms
Source: PubMed Central journal article supplement (PMC5141267; doi:10.1128/msystems.00149-16), 2016-12-06
Supplement: sys006162066sf4.pdf [file sys006162066sf4.pdf]

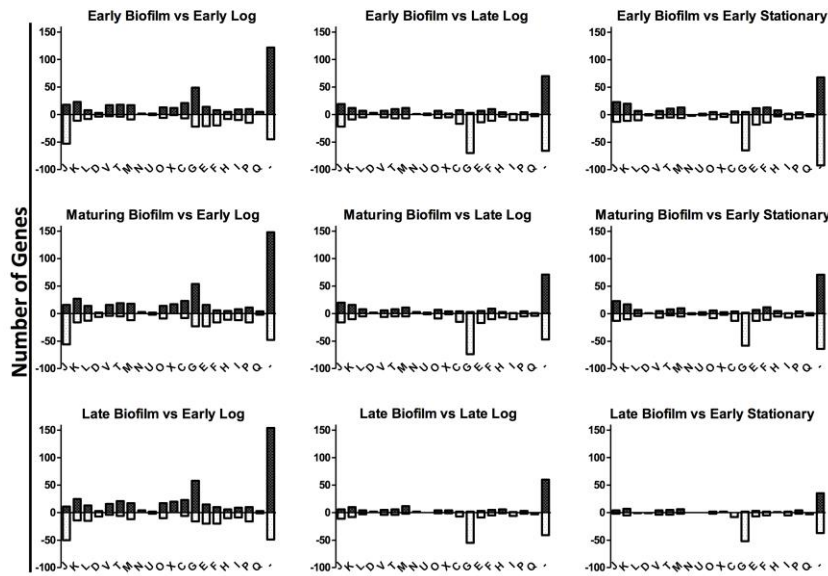

|                                                 |                                                                 |                                                            |
|-------------------------------------------------|-----------------------------------------------------------------|------------------------------------------------------------|
| <b>Information Storage &amp; Processing</b>     | <b>Cellular Processes Signaling</b>                             | <b>Metabolism</b>                                          |
| J Translation, ribosomal structure & biogenesis | D Cell cycle control, cell division, chromosome partitioning    | C Energy production & conversion                           |
| K Transcription                                 | V Defense mechanisms                                            | G Carbohydrate transport & metabolism                      |
| L Replication, recombination & repair           | T Signal transduction mechanisms                                | E Amino acid transport & metabolism                        |
| <b>Other</b>                                    | M Cell wall/membrane/envelope biogenesis                        | F Nucleotide transport & metabolism                        |
| X Mobilome: prophages, transposons              | N Cell motility                                                 | H Coenzyme transport & metabolism                          |
| - Poorly Characterized (R, S, or unclassified)  | U Intracellular trafficking, secretion, & vesicular transport   | I Lipid transport & metabolism                             |
|                                                 | O Post-translational modification, protein turnover, chaperones | P Inorganic ion transport & metabolism                     |
|                                                 | Q                                                               | Secondary metabolites biosynthesis, transport & catabolism |

Figure S3. Differential regulation of biofilm versus planktonic cell wall proteome according to COG classifications. The number of cell wall proteins in each COG differentially regulated at each biofilm versus planktonic time point are shown. Dark bars indicate the number of cell wall proteins in the COG up-regulated and light bars indicate the number of cell wall proteins down-regulated. COGs were analyzed with the R-package BOG (21) to identify COGs with a statistically greater than expected number of cell wall proteins showing differential expression. \*=adj. p value < 0.05 according to the Mann-Whitney Rank Sum test. The “Poorly Characterized” group includes COG classifications R (general function prediction only) and S (unknown function) in addition to unclassified proteins.
