# Supplementary material for: Global Analysis and Comparison of the Transcriptomes and Proteomes of Group A Streptococcus Biofilms
Source: PubMed Central journal article supplement (PMC5141267; doi:10.1128/msystems.00149-16), 2016-12-06
Supplement: sys006162066sf6.pdf [file sys006162066sf6.pdf]

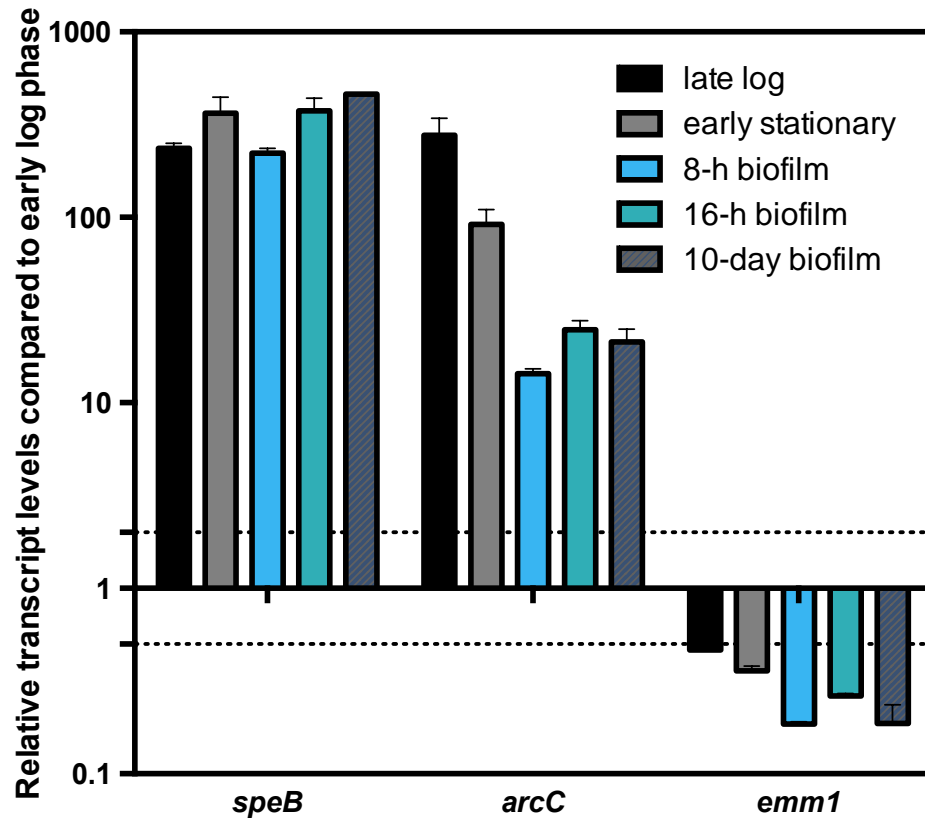

Figure S5. Real-time RT-PCR measurement of gene expression. Expression of the *speB*, *arcC* and *emm1* gene transcriptions were measured in total cellular RNA extracts from early log planktonic, late log planktonic, early stationary planktonic, early biofilm (8-h), maturing biofilm (16-h), or late biofilm (10-day) cultures. Transcript levels are represented as the ratio of expression at a given time point versus expression in early log phase. Error bars indicate standard error.
